# Supplementary material
Source: PubMed Central journal article supplement (PMC3760030)

**A.**

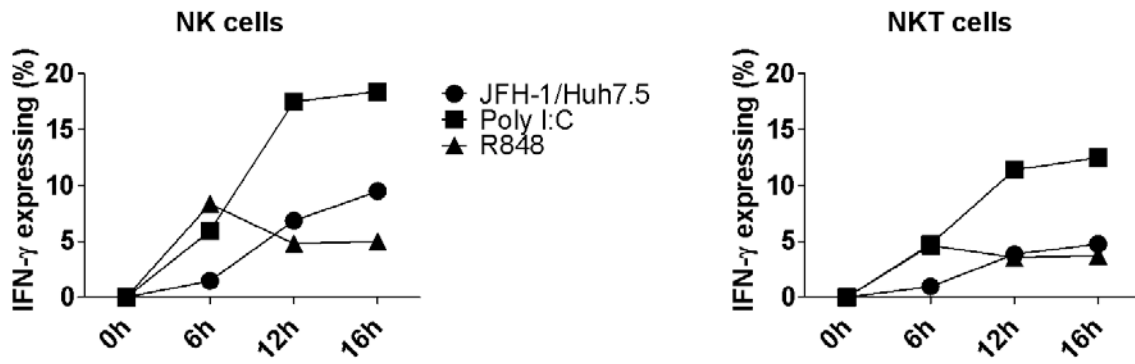

**B.**

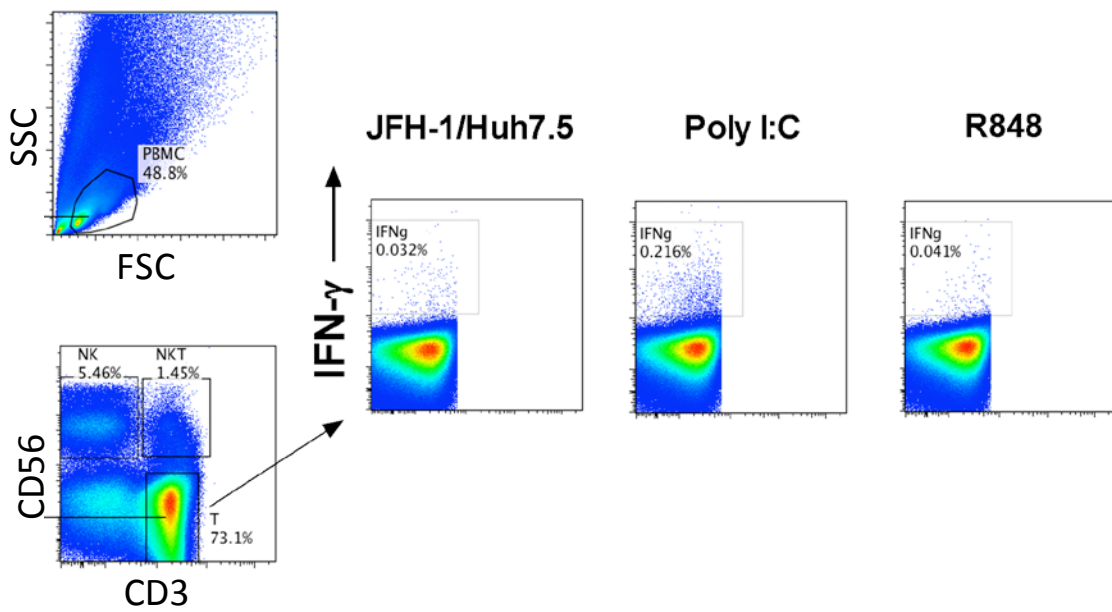

**Supporting Fig. 1**

Supplement: NIHMS502358-supplement-01.pdf [file NIHMS502358-supplement-01.pdf]

**A.**

**Gating Strategy**

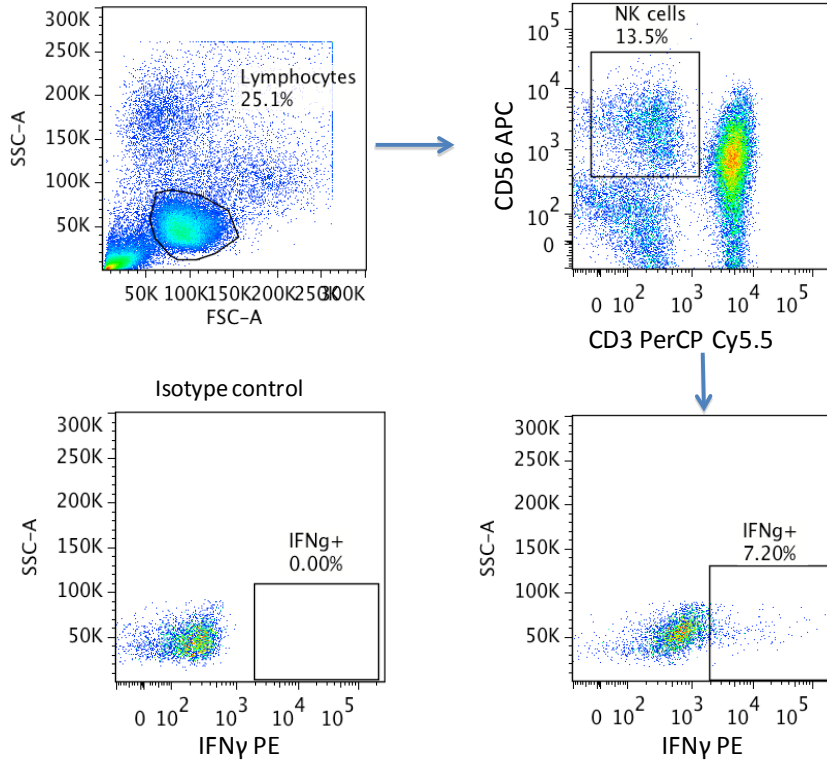

**B.**

**Healthy Control**

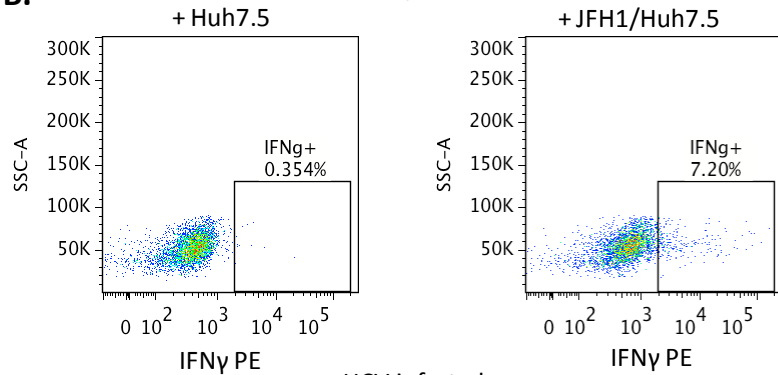

**HCV infected**

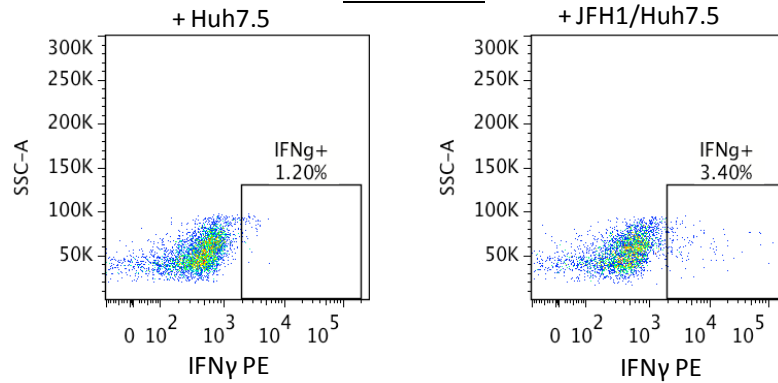

**Supporting Fig. 2**

Supplement: NIHMS502358-supplement-02.pdf [file NIHMS502358-supplement-02.pdf]

**C.** Healthy Control (Co culture with JFH1/Huh7.5)

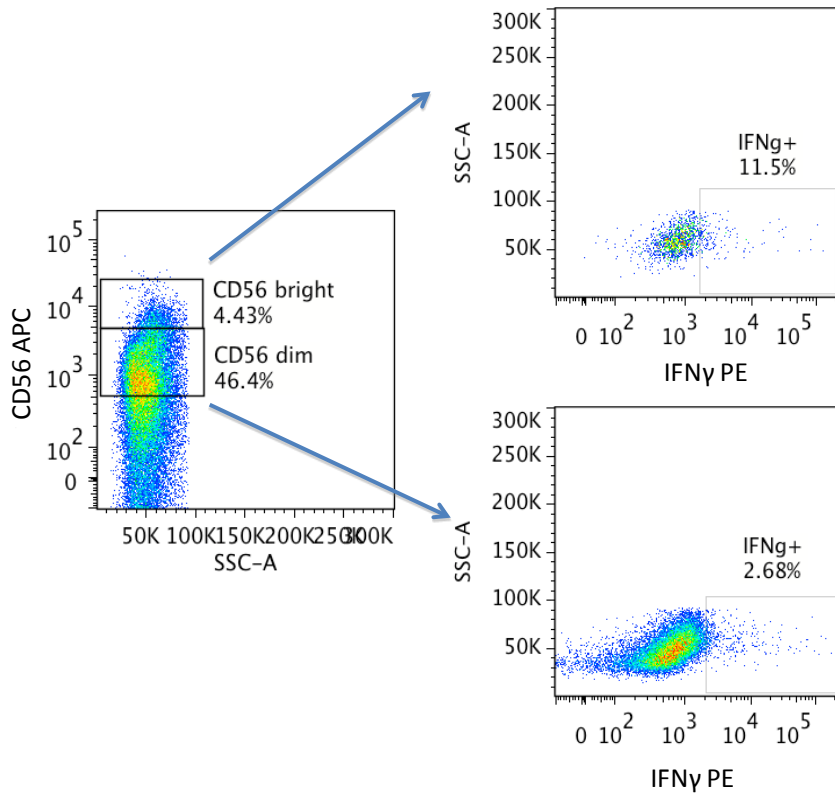

**D.** HCV infected (Co culture with JFH1/Huh7.5)

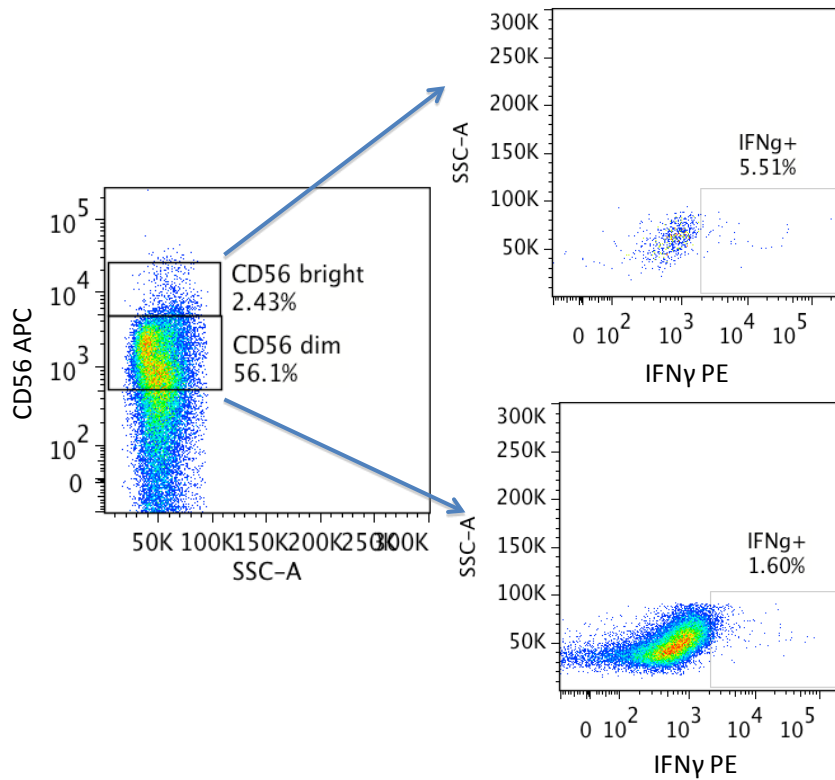

Supporting Fig. 2

Supplement: NIHMS502358-supplement-03.pdf [file NIHMS502358-supplement-03.pdf]

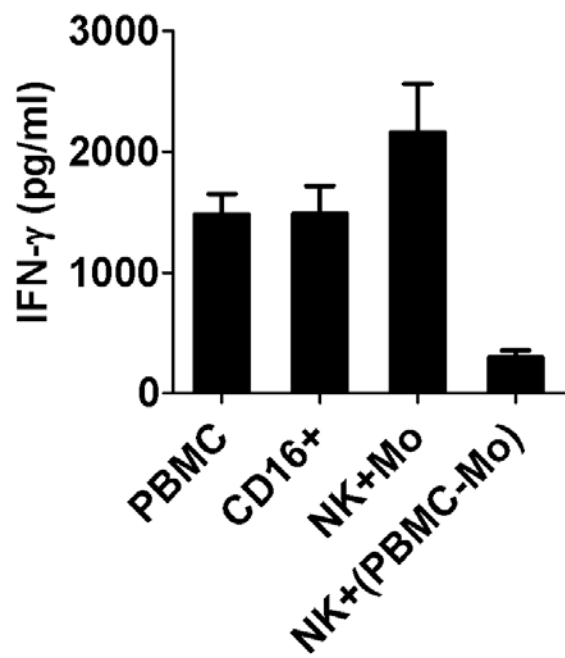

Supporting Fig. 3

Supplement: NIHMS502358-supplement-04.pdf [file NIHMS502358-supplement-04.pdf]

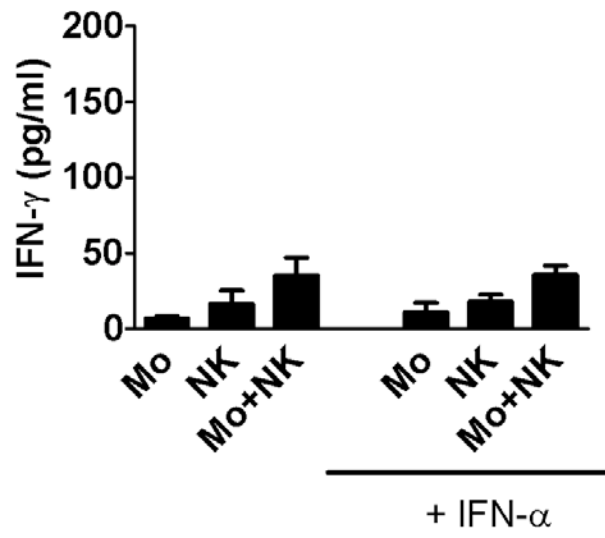

Supporting Fig. 4

Supplement: NIHMS502358-supplement-05.pdf [file NIHMS502358-supplement-05.pdf]

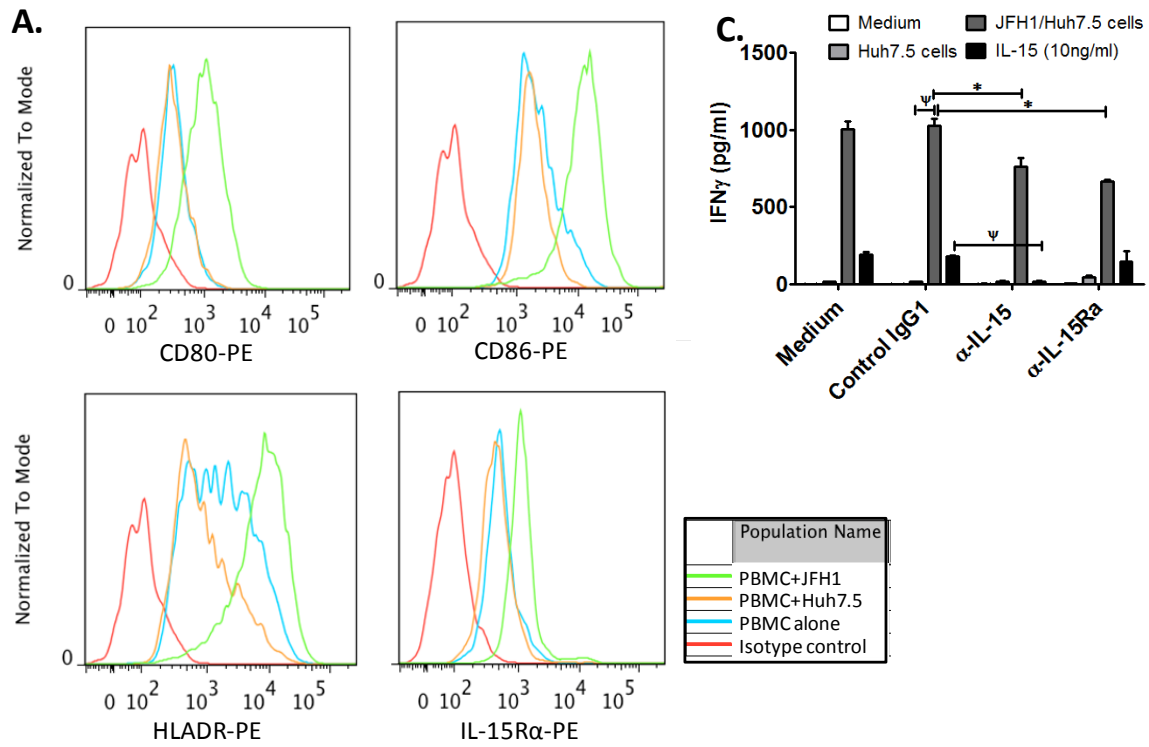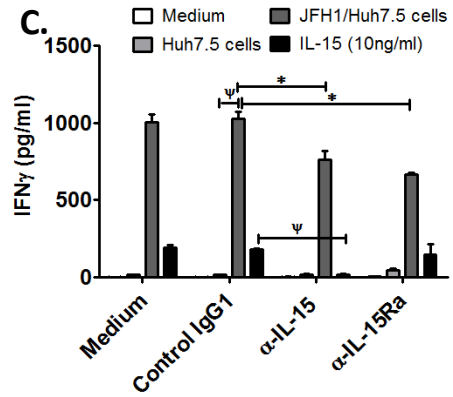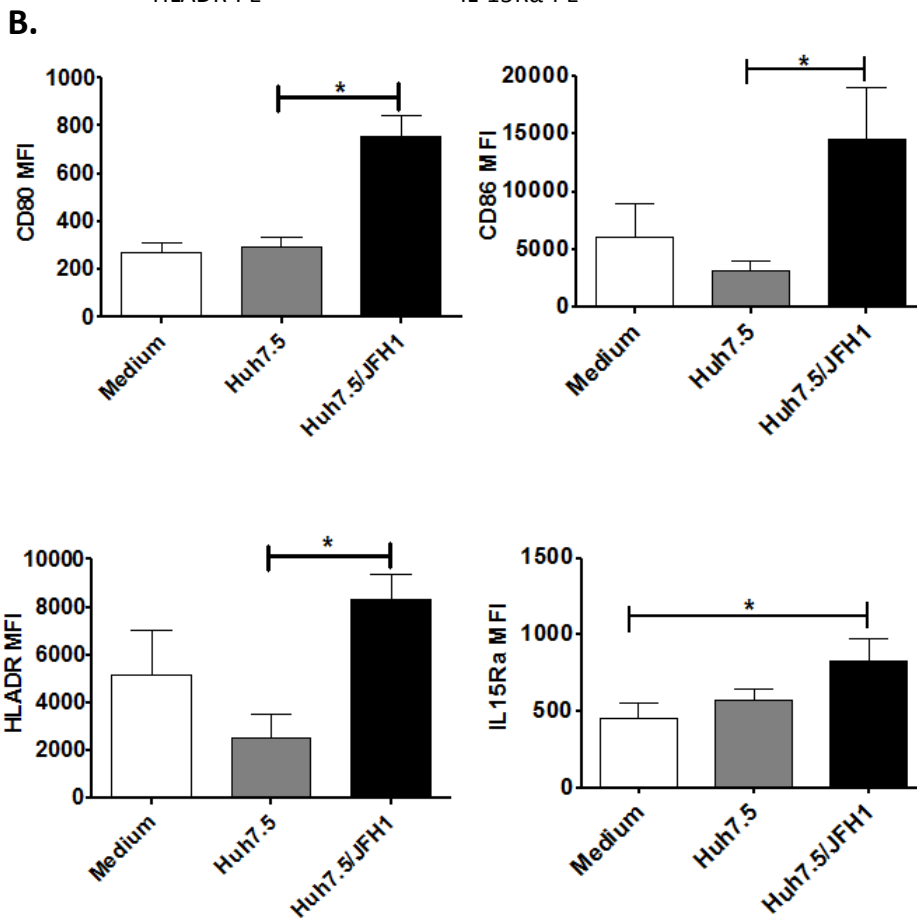

Supporting Fig. 5

Supplement: NIHMS502358-supplement-06.pdf [file NIHMS502358-supplement-06.pdf]

CD14+Mo

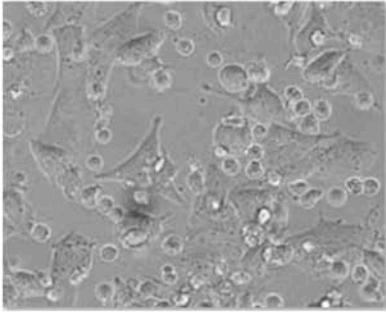

CD16+Mo

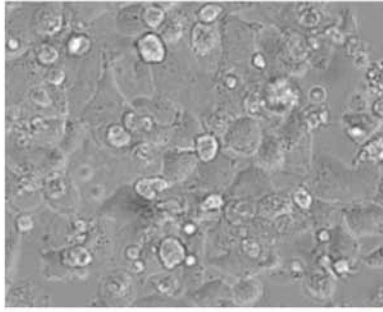

pDC

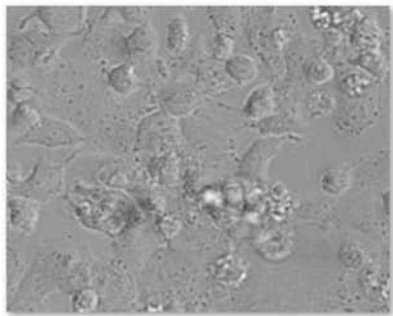

NK

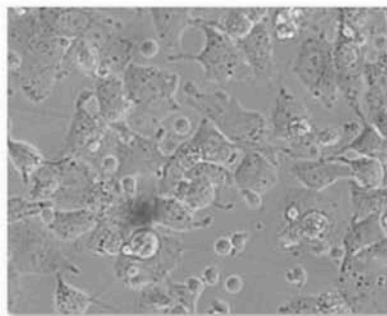

(CD14+Mo)+NK

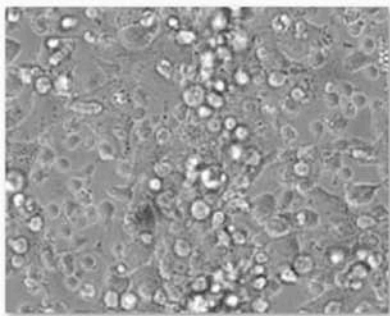

(CD16+Mo)+NK

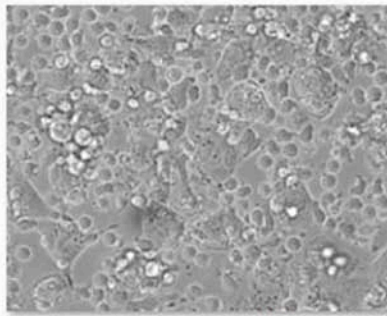

pDC+NK

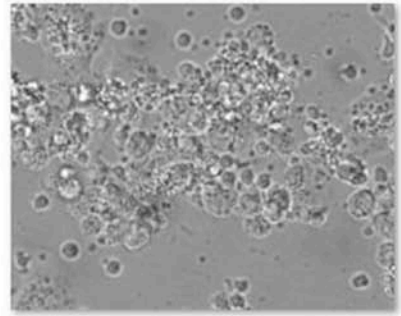

**Supporting Fig. 6**

Supplement: NIHMS502358-supplement-07.pdf [file NIHMS502358-supplement-07.pdf]

# Human Liver

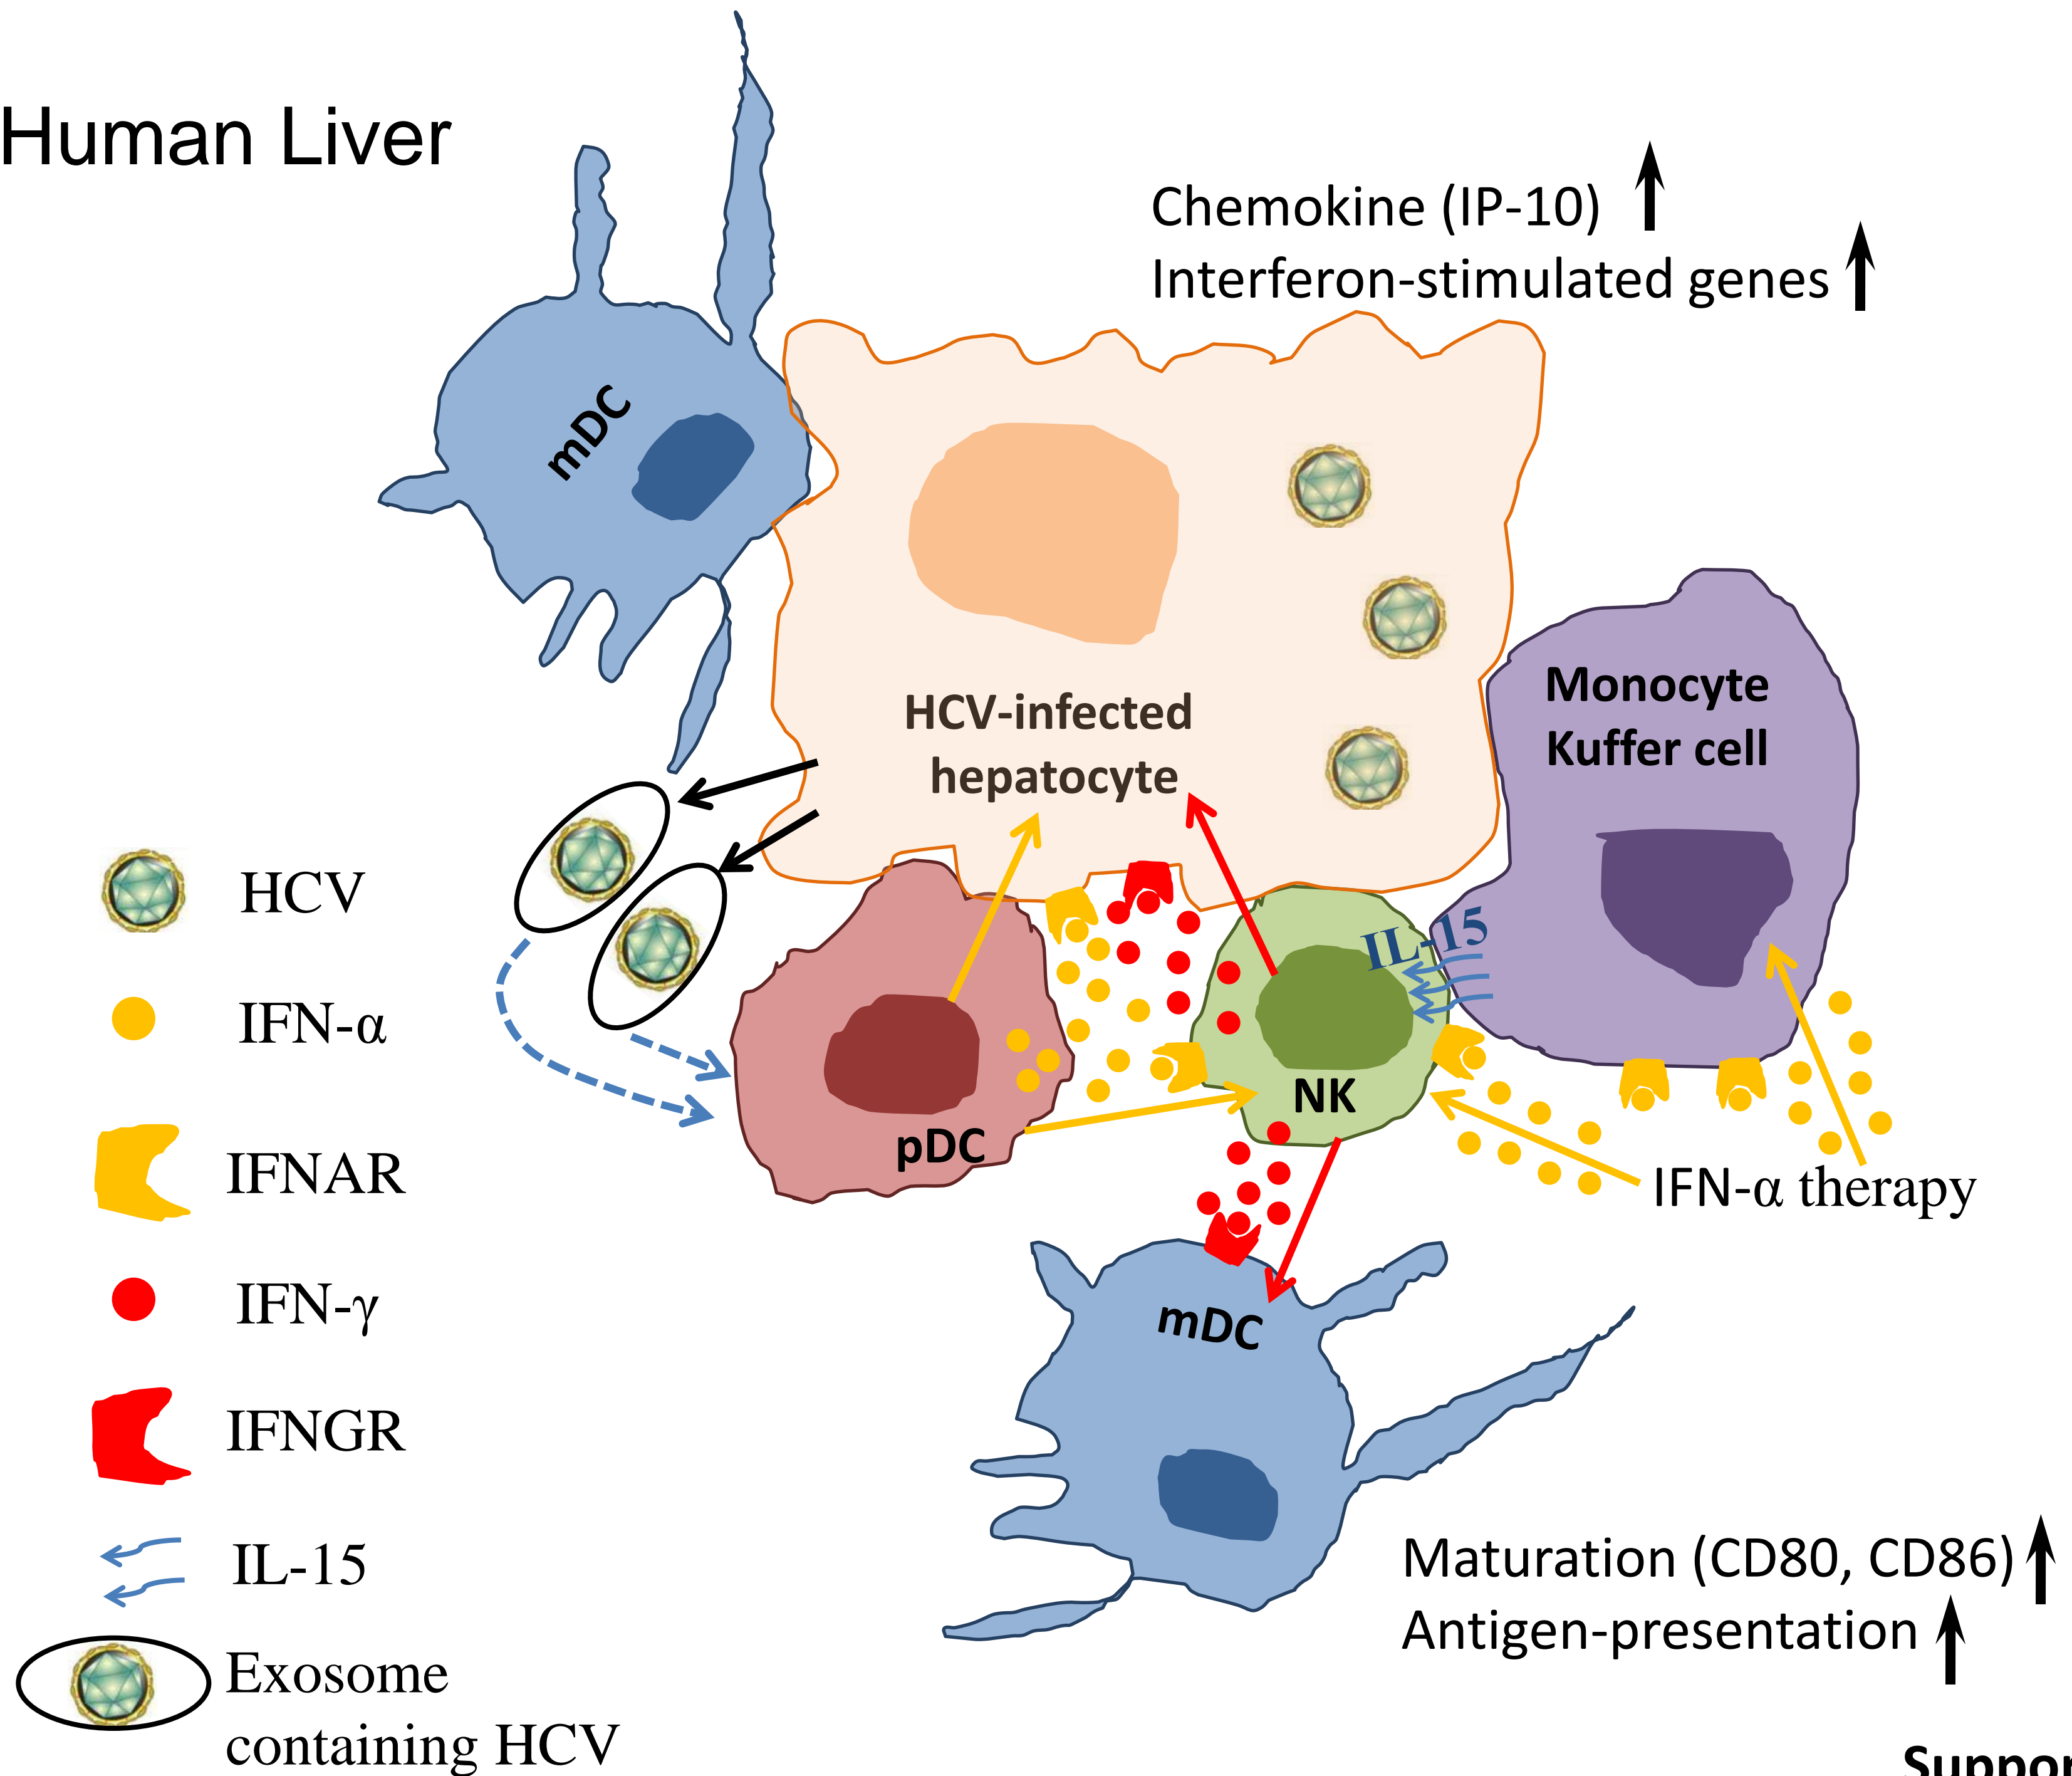

Supplement: NIHMS502358-supplement-08.pdf [file NIHMS502358-supplement-08.pdf]
